# Supplementary material
Source: Springer Nature journal article supplement (https://www.springermedizin.de/resource/supplementary/12963_2011_135_MOESM1_ESM.pdf/9572730)
Supplement: MOESM1 [file 9572730]

Facility  
Clinical  
Registries

Monthly  
Facility  
Report

SDSMAS,  
District  
Summary  
Report

DPPC  
Provincial  
Level Report

DIS/DPC,  
National  
Level  
Report

**Paper**  
**Updated daily**

**Paper**  
**Updated monthly**

**Paper/Electronic\***  
**Updated monthly**

**Electronic**  
**Updated monthly**

**Electronic**  
**Updated monthly**

Key: SDSMAS-district health department, DPPC-provincial health planning department, DIS-national health information department, DPC-national planning and cooperation department

\*Facility-level data is entered into the electronic database and can be aggregated as needed to the district, provincial or national levels
